# Supplementary material for: Inadequate ubiquitination-proteasome coupling contributes to myocardial ischemia-reperfusion injury
Source: JCI journal article supplement (doi:10.1172/jci98287), 2018-09-11
Supplement: sd1 [file 1]

**Online Supplementary Data for**  
**Inadequate Ubiquitination-Proteasome Coupling Contributes to**  
**Myocardial Ischemia-Reperfusion Injury**

Chengjun Hu<sup>1,2</sup>, Yihao Tian<sup>1,2\*</sup>, Hongxin Xu<sup>2,3</sup>, Bo Pan<sup>2</sup>, Erin M. Terpstra<sup>2</sup>, Penglong Wu<sup>2,4</sup>,  
Hongmin Wang<sup>2</sup>, Faqian Li<sup>5</sup>, Jinbao Liu<sup>4</sup>, Xuejun Wang<sup>2\*</sup>

From <sup>1</sup>Department of Human Anatomy, Wuhan University College of Basic Medical Sciences, Wuhan, Hubei 430071 China; <sup>2</sup>Division of Basic Biomedical Sciences, Sanford School of Medicine of the University of South Dakota, Vermillion, SD 57069, USA; <sup>3</sup>Department of Cardiology, Renmin Hospital of Wuhan University, Wuhan, Hubei, China; <sup>4</sup>Protein Modification and Degradation Lab, School of Basic Medical Sciences, Affiliated Tumor Hospital of Guangzhou Medical University, Guangzhou, Guangdong 511436, China; <sup>5</sup>Department of Pathology and Laboratory Medicine, University of Minnesota, Minneapolis, MN 55455, USA.

\*Address correspondence to: Dr. Yihao Tian, Department of Human Anatomy, Wuhan University College of Basic Medical Sciences, 185 Donghu Road, Wuhan, Hubei 430071, China, phone: (86) 18971158569, e-mail: [yihaotian@whu.edu.cn](mailto:yihaotian@whu.edu.cn); or Dr. Xuejun Wang, Division of Basic Biomedical Sciences, Sanford School of Medicine of the University of South Dakota, 414 East Clark Street, Vermillion, SD 57069, USA, phone: (01) 605 658-6345, e-mail: [Xuejun.Wang@usd.edu](mailto:Xuejun.Wang@usd.edu).

**Supplementary Tables 1 and 2 as well as Supplementary Figures 1 through 3.**

**Supplementary Table 1.** Echocardiographic characteristics of Ubqln1 CKO mice.

| Genotype    | Ubqln1 <sup>ff</sup> , Ubqln1 <sup>f/+</sup> ,<br>or Myh6-Cre<br>(n=9; 5m+4f) | Ubqln1 <sup>f/+</sup> ::Myh6-Cre<br>(n=8; 4m+4f) | Ubqln1 <sup>ff</sup> ::Myh6-Cre<br>(n=8; 4m+4f) |
|-------------|-------------------------------------------------------------------------------|--------------------------------------------------|-------------------------------------------------|
| HR (BPM)    | 474 ± 39                                                                      | 445 ± 65                                         | 460 ± 48 <sup>ns</sup>                          |
| EF (%)      | 52.14 ± 5.09                                                                  | 50.90 ± 6.52                                     | 52.76 ± 8.54 <sup>ns</sup>                      |
| FS (%)      | 26.81 ± 3.19                                                                  | 25.87 ± 4.19                                     | 27.08 ± 5.51 <sup>ns</sup>                      |
| SV (μL)     | 41.19 ± 6.85                                                                  | 42.36 ± 6.00                                     | 41.62 ± 7.86 <sup>ns</sup>                      |
| LVID;d (mm) | 4.18 ± 0.19                                                                   | 4.26 ± 0.13                                      | 4.14 ± 0.16 <sup>ns</sup>                       |
| LVID;s (mm) | 3.17 ± 0.21                                                                   | 3.34 ± 0.16                                      | 3.17 ± 0.28 <sup>ns</sup>                       |
| LVPW;d (mm) | 0.62 ± 0.03                                                                   | 0.62 ± 0.05                                      | 0.60 ± 0.00 <sup>ns</sup>                       |
| LVPW;s (mm) | 0.77 ± 0.05                                                                   | 0.75 ± 0.06                                      | 0.77 ± 0.06 <sup>ns</sup>                       |

Echocardiography was performed on littermate mice at 10 weeks of age. Mice with Ubqln1<sup>ff</sup>, Ubqln1<sup>f/+</sup>, or Myh6-Cre Tg genotype show no significant echocardiographic difference from sex- and age-matched WT mice at this age; hence, they are pooled here. Values are mean ± SD, HR = heart rate; EF = ejection fraction; FS = fractional shortening, SV = stroke volume; LVAW = left ventricular anterior wall thickness at end diastole (d) or end systole (s); LVPW = left ventricular posterior wall thickness; LVID = left ventricular internal dimension; ns p>0.05 among genotypes, 1 way ANOVA.

**Supplementary Table 2.**

## Antibodies Information

| <b>Proteins</b>           | <b>Catalog Number</b> | <b>Vendor</b>      |
|---------------------------|-----------------------|--------------------|
| $\alpha$ -Actinin         | A7811                 | Sigma              |
| FLAG                      | 8146                  | Cell Signaling     |
| GAPDH                     | 10R-G109a             | Fitzgerald         |
| GFP                       | sc-9996               | Santa Cruz         |
| LC3                       | M115-3                | MBL                |
| Psmb5                     | (N/A)                 | (custom made)      |
| Rpt2                      | BML-PW8305-0025       | Enzo Life Sciences |
| $\beta$ -Tubulin          | Sc-55529              | Santa Cruz         |
| Ubiquilin1                | ab3341                | Abcam              |
| Ubiquitin                 | sc-8017               | Santa Cruz         |
| K48-linked poly-ubiquitin | 05-1307               | Millipore Sigma    |
| K63-linked poly-ubiquitin | 05-1308               | Millipore Sigma    |
| UBXD2 (aka, Erasin)       | 21052-1-AP            | Proteintech        |

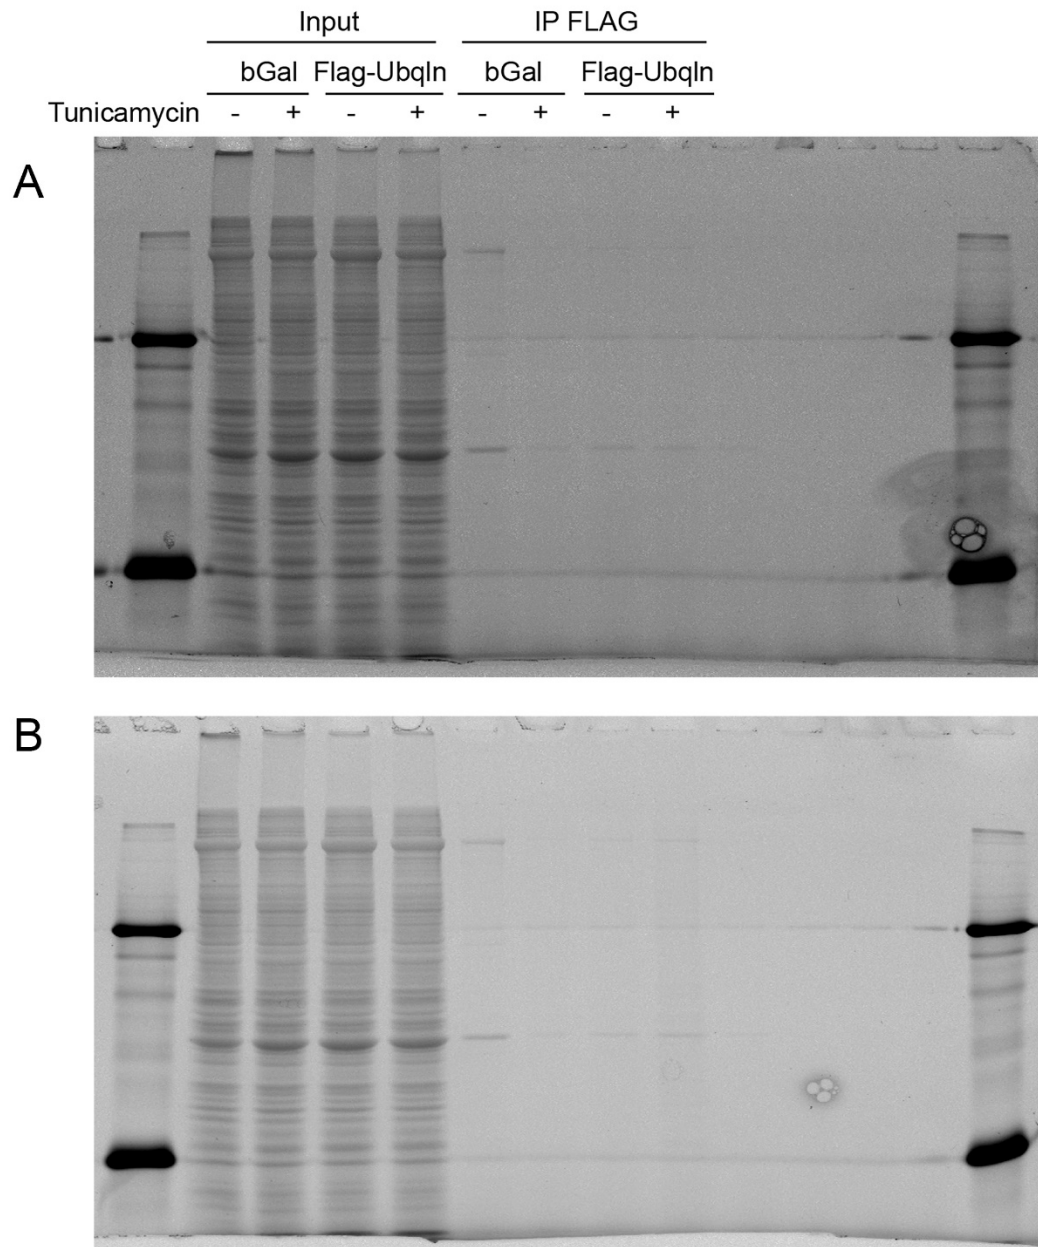

**Supplementary Figure 1.** Stain-free total protein images of the SDS-PAGE for the co-IP western blots for Ublqn1 (A) and UBXD2 and Rpt2 (B) as shown in main text Figure 1B. The PVDF membrane immunoblotted for UBXD2 was subsequently stripped and reprobred for Rpt2.

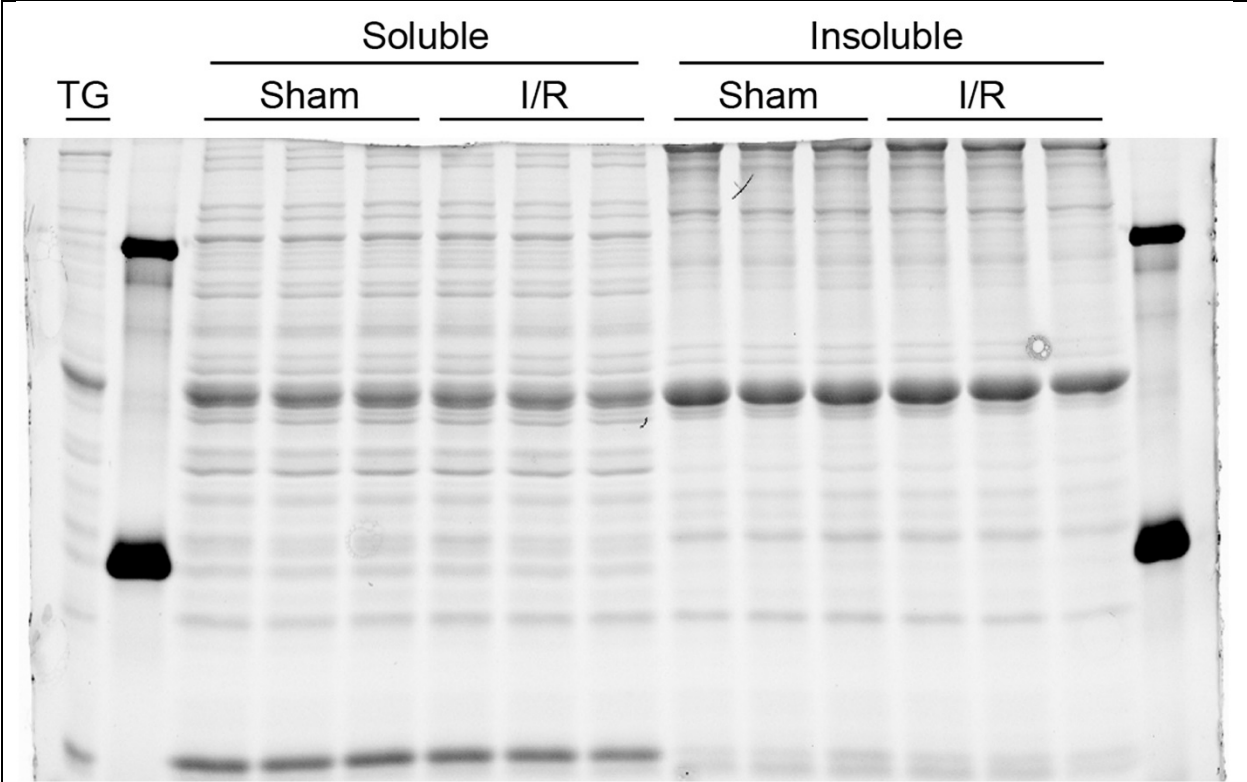

**Supplementary Figure 2.** The stain-free total protein image of the SDS-PAGE for the western blot analyses for myocardial Ubqln1 in I/R and sham control WT mice as shown in main text Figure 1C.

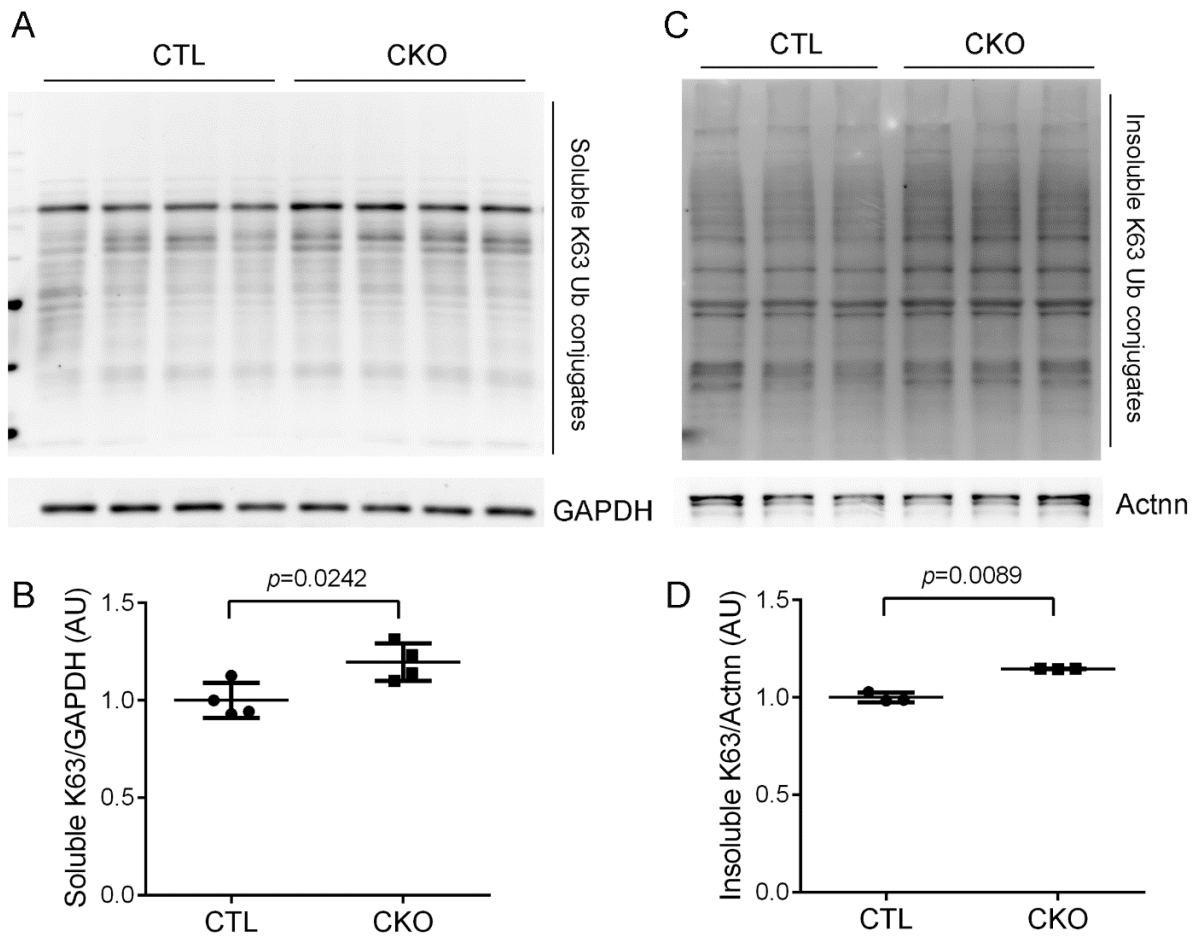

**Supplementary Figure 3.** Western blot analyses for myocardial K63-linked poly-ubiquitinated proteins in Ubq1n1-CKO (CKO) and littermate control (CTL) mice. Actn,  $\alpha$ -actinin; the  $p$  values are derived from two tailed  $t$ -tests with Welch correction for small sample size. See main text Figure 3 for additional legend.
